# Supplementary material for: AI based image analysis of red blood cells in oscillating microchannels
Source: Royal Society of Chemistry journal article supplement (doi:10.1039/d3ra04644c), 2023-01-01
Supplement: d3ra04644c3.pdf [file d3ra04644c3.pdf]

## AI based image analysis of red blood cells in oscillating microchannels

Andreas Link,<sup>a</sup> Irene Luna Pardo,<sup>a</sup> Bernd Porr<sup>a</sup> and Thomas Franke<sup>\*a</sup>

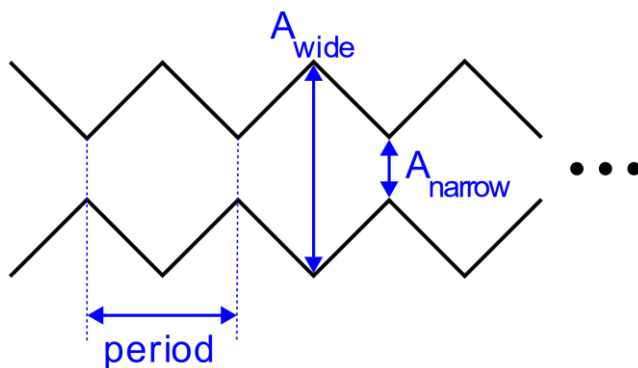

*Supplemental Figure 1 The periodicity of the zigzag-channel is  $L = 20 \mu\text{m}$  with amplitudes  $A_{wide} = 20 \mu\text{m}$  and  $A_{narrow} = 10 \mu\text{m}$ . In total are 16 periods but only the first wide and narrow section of the oscillation of the first period is used*

The Python code used in this study can be found at <https://doi.org/10.5281/zenodo.7789864>.

The python code which performs training, validation and testing on the RBC images. The main program is called "train.py" which can be started with "train.py -n" to use images in a narrow section or "train.py -w" on a wide section of the zigzag-shaped channel. The script will save the trained models, plots the training accuracy & loss and examples of cell classifications.
